# Supplementary material
Source: PubMed Central journal article supplement (PMC7906735)
Supplement: mmc1.pdf [file mmc1.pdf]

# THE LANCET Psychiatry

## Supplementary appendix

This appendix formed part of the original submission. We post it as supplied by the authors.

Supplement to: De Picker LJ, Casanova Dias M, Benros ME, et al. Severe mental illness and European COVID-19 vaccination strategies. *Lancet Psychiatry* 2021; published online Feb 17. [http://dx.doi.org/10.1016/S2215-0366\(21\)00046-8](http://dx.doi.org/10.1016/S2215-0366(21)00046-8).

**This online publication has been corrected. The corrected version first appeared at [thelancet.com/psychiatry](http://thelancet.com/psychiatry) on Feb 25, 2021.**

## Appendix

### 1. Methods for the screening of national vaccination strategies

We recruited a network of local informants (see Acknowledgements), chosen for their position in or connection with national psychiatric associations. Publicly available national vaccination strategy documents were collected and reviewed between January 14th and February 10<sup>th</sup> 2021 for 20 countries in the European region (Belgium, Czech republic, Denmark, Finland, France, Germany, Greece, Ireland, Italy, Latvia, Malta, the Netherlands, Norway, Poland, Portugal, Romania, Spain, Sweden, Turkey, United Kingdom). All written records were screened for: a) key terms “psychiatr\*” and “mental” (or their local equivalents); b) priority policies for adult residents of long-term care facilities and/or individuals in residential treatment (excluding nursing homes for elderly); c) detailed lists of risk conditions with priority indication, if specified. All written records were validated by two independent researchers; disagreement was resolved through consensus. As local policy can divert from official national guidelines, informants were also asked to supply any additional information on the vaccination policy for patients with mental illness in their region or country.

### 2. List of country vaccination strategy source documents

| Country        | Source(s)                                                                                                                                                                                                                                                                                                                                                                                                                                                                                                                                                                                                                                                                                                                                                                                                                                                                                                                                                          | Last updated   |
|----------------|--------------------------------------------------------------------------------------------------------------------------------------------------------------------------------------------------------------------------------------------------------------------------------------------------------------------------------------------------------------------------------------------------------------------------------------------------------------------------------------------------------------------------------------------------------------------------------------------------------------------------------------------------------------------------------------------------------------------------------------------------------------------------------------------------------------------------------------------------------------------------------------------------------------------------------------------------------------------|----------------|
| Belgium        | <a href="https://d34j62pglfm3rr.cloudfront.net/downloads/Note_TF_Strategy_Vaccination_NL_0312_post_press.pdf">https://d34j62pglfm3rr.cloudfront.net/downloads/Note_TF_Strategy_Vaccination_NL_0312_post_press.pdf</a><br><a href="https://www.health.belgium.be/en/report-9618-prioritization-risk-groups-sars-cov-2-vaccination-phase-1b">https://www.health.belgium.be/en/report-9618-prioritization-risk-groups-sars-cov-2-vaccination-phase-1b</a>                                                                                                                                                                                                                                                                                                                                                                                                                                                                                                             | Feb 5th, 2021  |
| Czech Republic | <a href="https://covid.gov.cz/situace/ockovani">https://covid.gov.cz/situace/ockovani</a>                                                                                                                                                                                                                                                                                                                                                                                                                                                                                                                                                                                                                                                                                                                                                                                                                                                                          | Jan 21st, 2021 |
| Denmark        | <a href="https://www.sst.dk/da/Udgivelser/2020/Personer-med-oeget-risiko-ved-COVID-19">https://www.sst.dk/da/Udgivelser/2020/Personer-med-oeget-risiko-ved-COVID-19</a><br><a href="https://www.sst.dk/-/media/Udgivelser/2020/Corona/Oeget-risiko/Pjece-Personer-i-oeget-risiko---Fagligt-grundlag.ashx?la=da&amp;hash=E7CCE677FACE1651369B2B98074721FE11B35CF9">https://www.sst.dk/-/media/Udgivelser/2020/Corona/Oeget-risiko/Pjece-Personer-i-oeget-risiko---Fagligt-grundlag.ashx?la=da&amp;hash=E7CCE677FACE1651369B2B98074721FE11B35CF9</a>                                                                                                                                                                                                                                                                                                                                                                                                                 | Feb 10th, 2021 |
| Finland        | <a href="https://thl.fi/en/web/infectious-diseases-and-vaccinations/what-s-new/coronavirus-covid-19-latest-updates/transmission-and-protection-coronavirus/vaccines-and-coronavirus/vaccination-order-and-at-risk-groups-for-covid-19">https://thl.fi/en/web/infectious-diseases-and-vaccinations/what-s-new/coronavirus-covid-19-latest-updates/transmission-and-protection-coronavirus/vaccines-and-coronavirus/vaccination-order-and-at-risk-groups-for-covid-19</a>                                                                                                                                                                                                                                                                                                                                                                                                                                                                                            | Jan 13th, 2021 |
| France         | <a href="https://www.has-sante.fr/jcms/p_3178533/fr/vaccination-dans-le-cadre-de-la-covid-19#toc_1_1_2">https://www.has-sante.fr/jcms/p_3178533/fr/vaccination-dans-le-cadre-de-la-covid-19#toc_1_1_2</a>                                                                                                                                                                                                                                                                                                                                                                                                                                                                                                                                                                                                                                                                                                                                                          | Jan 22nd, 2021 |
| Germany        | <a href="https://www.rki.de/DE/Content/Infekt/EpidBull/Archiv/2021/Ausgaben/05_21.pdf">https://www.rki.de/DE/Content/Infekt/EpidBull/Archiv/2021/Ausgaben/05_21.pdf</a><br><a href="https://www.bundesgesundheitsministerium.de/fileadmin/Dateien/3_Downloads/C/Coronavirus/Ve_rordnungen/CoronaImpfV_-_De_Buette.pdf">https://www.bundesgesundheitsministerium.de/fileadmin/Dateien/3_Downloads/C/Coronavirus/Ve_rordnungen/CoronaImpfV_-_De_Buette.pdf</a><br><a href="https://www.bundesregierung.de/breg-de/aktuelles/corona-impfverordnung-1829940.pdf">https://www.bundesregierung.de/breg-de/aktuelles/corona-impfverordnung-1829940.pdf</a><br><a href="https://www.bundesregierung.de/resource/blob/975226/1851894/e195f7a8ee3e463e5947c8254b6be1d5/2021-02-08-impfverordnung-neu-data.pdf?download=1">https://www.bundesregierung.de/resource/blob/975226/1851894/e195f7a8ee3e463e5947c8254b6be1d5/2021-02-08-impfverordnung-neu-data.pdf?download=1</a> | Feb 9th, 2021  |
| Greece         | <a href="https://emvolio.gov.gr/diadiakasia-emvoliasmou">https://emvolio.gov.gr/diadiakasia-emvoliasmou</a>                                                                                                                                                                                                                                                                                                                                                                                                                                                                                                                                                                                                                                                                                                                                                                                                                                                        | Jan 11th, 2021 |
| Ireland        | <a href="https://assets.gov.ie/108854/babc7d1b-cb10-49db-8dd0-0c7408dea162.pdf">https://assets.gov.ie/108854/babc7d1b-cb10-49db-8dd0-0c7408dea162.pdf</a><br><a href="https://www.gov.ie/en/publication/39038-provisional-vaccine-allocation-groups/">https://www.gov.ie/en/publication/39038-provisional-vaccine-allocation-groups/</a>                                                                                                                                                                                                                                                                                                                                                                                                                                                                                                                                                                                                                           | Feb 3rd, 2021  |
| Italy          | <a href="https://info.vaccinocovid.gov.it/">https://info.vaccinocovid.gov.it/</a>                                                                                                                                                                                                                                                                                                                                                                                                                                                                                                                                                                                                                                                                                                                                                                                                                                                                                  | Dec 12th, 2020 |
| Latvia         | <a href="https://www.vm.gov.lv/lv/vakcinacija-pret-covid-19">https://www.vm.gov.lv/lv/vakcinacija-pret-covid-19</a>                                                                                                                                                                                                                                                                                                                                                                                                                                                                                                                                                                                                                                                                                                                                                                                                                                                | Jan 13th, 2021 |
| Malta          | <a href="https://deputyprimeminister.gov.mt/en/health-promotion/covid-19/Pages/vaccines.aspx">https://deputyprimeminister.gov.mt/en/health-promotion/covid-19/Pages/vaccines.aspx</a>                                                                                                                                                                                                                                                                                                                                                                                                                                                                                                                                                                                                                                                                                                                                                                              | N/A            |
| Netherlands    | <a href="https://www.rijksoverheid.nl/documenten/publicaties/2021/01/13/flowchart-vaccins">https://www.rijksoverheid.nl/documenten/publicaties/2021/01/13/flowchart-vaccins</a><br><a href="https://www.rijksoverheid.nl/documenten/kamerstukken/2021/01/04/kamerbrief-over-covid-19-vaccinatiestrategie-update-stand-van-zaken">https://www.rijksoverheid.nl/documenten/kamerstukken/2021/01/04/kamerbrief-over-covid-19-vaccinatiestrategie-update-stand-van-zaken</a>                                                                                                                                                                                                                                                                                                                                                                                                                                                                                           | Jan 4th, 2021  |

|                |                                                                                                                                                                                                                                                                                                                                                                                                                                                                                                                                                                                                                                                             |                |
|----------------|-------------------------------------------------------------------------------------------------------------------------------------------------------------------------------------------------------------------------------------------------------------------------------------------------------------------------------------------------------------------------------------------------------------------------------------------------------------------------------------------------------------------------------------------------------------------------------------------------------------------------------------------------------------|----------------|
| Norway         | <a href="https://www.fhi.no/sv/vaksine/koronavaksinasjonsprogrammet/hvem-kan-fa-koronavaksine/">https://www.fhi.no/sv/vaksine/koronavaksinasjonsprogrammet/hvem-kan-fa-koronavaksine/</a>                                                                                                                                                                                                                                                                                                                                                                                                                                                                   | N/A            |
| Poland         | <a href="https://www.gov.pl/web/szczepimysie/narodowy-program-szczepien-przeciw-covid-19">https://www.gov.pl/web/szczepimysie/narodowy-program-szczepien-przeciw-covid-19</a>                                                                                                                                                                                                                                                                                                                                                                                                                                                                               | Dec 8th, 2020  |
| Portugal       | <a href="https://www.sns.gov.pt/vacinacaocovid19/plano-de-vacinacao-covid-19/">https://www.sns.gov.pt/vacinacaocovid19/plano-de-vacinacao-covid-19/</a><br><a href="https://covid19.min-saude.pt/vacinacao/?fbclid=IwAR2_scyjZmshrvGdfaQ7q3-QxhGaoW-jH0CWJnODpryT3iuBvSrChYIDSW18">https://covid19.min-saude.pt/vacinacao/?fbclid=IwAR2_scyjZmshrvGdfaQ7q3-QxhGaoW-jH0CWJnODpryT3iuBvSrChYIDSW18</a>                                                                                                                                                                                                                                                        | Jan 28th, 2021 |
| Romania        | <a href="https://vaccinare-covid.gov.ro/wp-content/uploads/2020/12/Strategia-vaccinare-02-12-2020-CL-FINAL-cu-COVID-19-tabel-2_CUPRINS-UPDATE-1.pdf">https://vaccinare-covid.gov.ro/wp-content/uploads/2020/12/Strategia-vaccinare-02-12-2020-CL-FINAL-cu-COVID-19-tabel-2_CUPRINS-UPDATE-1.pdf</a><br><a href="https://vaccinare-covid.gov.ro/vaccinarea-sars-cov-2/procesul-de-vaccinare-in-romania/">https://vaccinare-covid.gov.ro/vaccinarea-sars-cov-2/procesul-de-vaccinare-in-romania/</a><br><a href="https://vaccinare-covid.gov.ro/wp-content/uploads/2021/01/flyer.pdf">https://vaccinare-covid.gov.ro/wp-content/uploads/2021/01/flyer.pdf</a> | Jan x, 2021    |
| Spain          | <a href="https://www.msbs.gob.es/profesionales/saludPublica/prevPromocion/vacunaciones/covid19/docs/COVID-19_Actualizacion1_EstrategiaVacunacion.pdf">https://www.msbs.gob.es/profesionales/saludPublica/prevPromocion/vacunaciones/covid19/docs/COVID-19_Actualizacion1_EstrategiaVacunacion.pdf</a>                                                                                                                                                                                                                                                                                                                                                       | Dec 18th, 2020 |
| Sweden         | <a href="https://www.folkhalsomyndigheten.se/smittskydd-beredskap/utbrott/aktuella-utbrott/covid-19/vaccination-mot-covid-19/rekommendationer-for-vaccination-mot-covid-19/">https://www.folkhalsomyndigheten.se/smittskydd-beredskap/utbrott/aktuella-utbrott/covid-19/vaccination-mot-covid-19/rekommendationer-for-vaccination-mot-covid-19/</a>                                                                                                                                                                                                                                                                                                         | Feb 5th, 2021  |
| Turkey         | <a href="https://covid19asi.saglik.gov.tr/TR-77707/covid-19-asisi-uygulanacak-kisiler.html">https://covid19asi.saglik.gov.tr/TR-77707/covid-19-asisi-uygulanacak-kisiler.html</a>                                                                                                                                                                                                                                                                                                                                                                                                                                                                           | Jan 7th, 2021  |
| United Kingdom | <a href="https://www.gov.uk/government/publications/priority-groups-for-coronavirus-covid-19-vaccination-advice-from-the-jcvi-30-december-2020/joint-committee-on-vaccination-and-immunisation-advice-on-priority-groups-for-covid-19-vaccination-30-december-2020">https://www.gov.uk/government/publications/priority-groups-for-coronavirus-covid-19-vaccination-advice-from-the-jcvi-30-december-2020/joint-committee-on-vaccination-and-immunisation-advice-on-priority-groups-for-covid-19-vaccination-30-december-2020</a>                                                                                                                           | Jan 6th, 2021  |

Abbreviations: N/A, Not available.

### 3. Author affiliations with organisations endorsing the manuscript

- *European College of Neuropsychopharmacology (ECNP)*: ML is ECNP Executive Committee member; LJDP, BV, IB, FB, MEB, AB, JCL, CMP, RT, PFP and ML are members of the ECNP Immunopsychiatry Thematic Working Group.

- *European Psychiatric Association (EPA)*: JB is EPA Executive Committee member; JB, MM and HK are EPA Board members; LDP and JB are members of EPA Committee on Education; MCD and ES are secretary and councillor of the EPA Section of Women, Gender and Mental Health.

- *European Federation of Associations of Families of People with Mental Illness (EUFAMI)*: MM is EUFAMI President;

- *Global Alliance of Mental Illness Advocacy Networks-Europe (GAMIAN-Europe)*: HK is GAMIAN-Europe President;

- *European Union of Medical Specialists Section of Psychiatry (UEMS-Psychiatry)*: MCD is UEMS-Psychiatry Vice-President for CME; ES is UEMS-Psychiatry representative of Psychiatric Association of Turkey.

**Table: Policies and risk comorbidities specified in national COVID-19 vaccination strategies**

| Features of national COVID-19 vaccination strategies |                                             | Risk comorbidities selected for priority vaccination and their effect sizes (95%CI) for COVID-19 associated mortality risk † |                            |                       |                         |              |                    |                       |                        |                       |               |        |                           |                     |                                                |                  |                                  |               |                          |                                       |           |                          |                       |
|------------------------------------------------------|---------------------------------------------|------------------------------------------------------------------------------------------------------------------------------|----------------------------|-----------------------|-------------------------|--------------|--------------------|-----------------------|------------------------|-----------------------|---------------|--------|---------------------------|---------------------|------------------------------------------------|------------------|----------------------------------|---------------|--------------------------|---------------------------------------|-----------|--------------------------|-----------------------|
|                                                      |                                             | Cardiovascular                                                                                                               |                            |                       | Metabolic               |              |                    | Cancer                | Lung                   |                       | Immune system |        | Other                     |                     | Central nervous system                         |                  |                                  |               |                          |                                       |           |                          |                       |
|                                                      | Mentions psychiatry / mental illness (<65y) | Priority for institutionalised persons (<65y)                                                                                | List of risk comorbidities | Cardiac insufficiency | Coronary artery disease | Hypertension | Dia-betes mellitus | Obesity (BMI cut-off) | Chronic kidney disease | Chronic liver disease | Cancer        | Asthma | Chronic pulmonary disease | Auto-immune disease | Immuno-compromised conditions (incl. asplenia) | Post-trans-plant | Sickle cell anemia / thalassemia | Down syndrome | Cerebro-vascular disease | Chronic neurological/muscular illness | Demen-tia | Intellec-tual disability | Severe mental illness |
| Country                                              |                                             |                                                                                                                              |                            |                       |                         |              |                    |                       |                        |                       |               |        |                           |                     |                                                |                  |                                  |               |                          |                                       |           |                          |                       |
| Belgium                                              | 1                                           | 1                                                                                                                            | Y                          | 1                     | 1                       | 1            | 1                  | 1 (>30)               | 1                      | 1                     | 1             | 1      | 1                         | 1                   | 1                                              | 1                | 1                                | 1             | 1                        | 1                                     | 1         |                          |                       |
| Czech republic                                       | 0                                           | 1                                                                                                                            | Y                          | 1                     | 1                       | 1            | 1 (>35)            | 1                     | 1                      | 1                     | 1             | 1      | 1                         |                     | 1                                              | 1                |                                  |               | 1                        | 1                                     |           | 1                        |                       |
| Denmark                                              | 1                                           | 1                                                                                                                            | Y                          | 1                     | 1                       | 1            | 1                  | 1                     | 1                      | 1                     | 1             | 1      | 1                         | 1                   | 1                                              | 1                | 1                                | 1             | 1                        | 1                                     | 1         |                          | 1                     |
| Finland                                              | 0                                           | 1                                                                                                                            | Y                          | 2                     |                         |              |                    |                       | 1                      | 2                     | 1             |        | 1                         | 1                   | 1                                              | 1                |                                  |               |                          |                                       |           |                          |                       |
| France                                               | 1                                           | 1                                                                                                                            | Y                          | 1                     | 1                       | 1            | 1 (>30)            | 1                     |                        |                       | 1             | 1      | 1                         | 1                   | 1                                              | 1                |                                  | 1             |                          |                                       |           |                          |                       |
| Germany                                              | 1                                           | 1                                                                                                                            | Y                          | 2                     | 2                       | 2            | 1 (>30)            | 1                     | 1                      | 1                     | 1             | 2      | 1                         | 2                   | 2                                              | 1                | 1                                | 1             | 2                        | 2                                     | 1         | 1                        | 1                     |
| Greece                                               | 0                                           | 1                                                                                                                            | N                          |                       |                         |              |                    |                       |                        |                       |               |        |                           |                     |                                                |                  |                                  |               |                          |                                       |           |                          |                       |
| Ireland                                              | 0                                           | 1                                                                                                                            | Y                          | 1                     | 1                       | 1            | 1 (>40)            | 1                     | 1                      | 1                     | 1             | 1      | 1                         | 1                   | 1                                              | 1                | 1                                | 1             | 1                        | 1                                     |           |                          |                       |
| Italy*                                               | 0                                           | 0                                                                                                                            | N                          |                       |                         |              |                    |                       |                        |                       |               |        |                           |                     |                                                |                  |                                  |               |                          |                                       |           |                          |                       |
| Latvia                                               | 0                                           | 1                                                                                                                            | Y                          | 1                     | 1                       | 2            | 1 (>30)            | 1                     | 2                      | 2                     | 1             | 2      | 2                         | 1                   | 2                                              | 2                | 1                                | 1             |                          |                                       |           |                          |                       |
| Malta                                                | 1                                           | 1                                                                                                                            | N                          |                       |                         |              |                    |                       |                        |                       |               |        |                           |                     |                                                |                  |                                  |               |                          |                                       |           |                          |                       |
| Netherlands                                          | 1                                           | 1                                                                                                                            | Y                          | 1                     | 1                       |              | 1                  |                       |                        | 1                     |               |        |                           | 1                   | 1                                              | 1                |                                  |               |                          |                                       |           | 1                        | 1                     |
| Norway                                               | 0                                           | 0                                                                                                                            | Y                          | 2                     | 2                       |              | 2 (>35)            | 1                     | 2                      | 2                     | 1             | 2      | 2                         | 2                   | 1                                              | 1                |                                  | 1             | 2                        | 1                                     | 2         |                          |                       |
| Poland                                               | 0                                           | 1                                                                                                                            | Y                          | 1                     | 1                       | 1            | 1                  |                       | 1                      | 1                     | 1             | 1      | 1                         | 1                   | 1                                              | 1                | 1                                | 1             | 1                        | 1                                     | 1         |                          |                       |
| Portugal                                             | 0                                           | 1                                                                                                                            | Y                          | 1                     | 1                       | 2            | 2 (>35)            | 1                     | 2                      | 2                     | 2             | 1      | 1                         |                     |                                                |                  |                                  |               | 1                        | 1                                     | 1         |                          |                       |
| Romania                                              | 0                                           | 0                                                                                                                            | Y                          | 1                     | 1                       | 1            | 1                  | 1                     | 1                      | 1                     | 1             | 1      | 1                         | 1                   | 1                                              | 1                | 1                                | 1             | 1                        | 1                                     | 1         |                          |                       |
| Spain                                                | 1                                           | 1                                                                                                                            | N                          |                       |                         |              |                    |                       |                        |                       |               |        |                           |                     |                                                |                  |                                  |               |                          |                                       |           |                          |                       |
| Sweden**                                             | 0                                           | 1                                                                                                                            | Y                          | 1                     | 1                       | 1            | 1                  | 1                     | 1                      | 1                     | 1             | 1      | 1                         | 1                   | 1                                              | 1                | 1                                | 1             | 1                        | 1                                     | 1         | 1                        | 1                     |
| Turkey                                               | 0                                           | 1                                                                                                                            | N                          |                       |                         |              |                    |                       |                        |                       |               |        |                           |                     |                                                |                  |                                  |               |                          |                                       |           |                          |                       |
| UK                                                   | 1                                           | 0                                                                                                                            | Y                          | 2                     | 2                       |              | 2 (>35)            | 1                     | 2                      | 2                     | 1             | 1      | 1                         | 1                   | 1                                              | 1                | 1                                | 1             | 2                        | 2                                     | 2         | 2                        | 2                     |

**Legend:**

Risk comorbidities selected for priority vaccination: 1=highest priority risk comorbidities (tier 1); 2=priority risk comorbidities (tier 2).

Effect sizes for COVID-19 mortality in risk comorbidities were adapted from umbrella review by Robert Koch Institut for the German national vaccination strategy, (literature search performed Dec 11<sup>th</sup>, 2020, published Jan 29<sup>th</sup>, 2021).<sup>6</sup> Effect sizes are OR, adjusted for at least the age of the study participants, unless otherwise specified.

\*Two out of 20 Italian regions (Liguria and Veneto) are giving priority to residential care centers for people with disability and mental illness.

\*\*Besides ‘persons with a disease or condition involving an increase in risk’, Sweden also prioritises a broader group of ‘persons with a condition that involves difficulties in following advice on infectious disease control measures. This applies to people 18-59 years of age with dementia and cognitive or mental impairment. This also applies to people living in socially vulnerable situations.’

Abbreviations: NA=not available / not applicable; BMI=body mass index; Y=yes; N=no
